# Supplementary material for: Platanus hispanica-inspired design of Co–carbon nanotube frameworks through chemical vapor deposition: a highly integrated hierarchical electrocatalyst for oxygen reduction reactions
Source: Royal Society of Chemistry journal article supplement (doi:10.1039/c6cc07716a), 2016-01-01
Supplement: c6cc07716a1.pdf [file c6cc07716a1.pdf]

## Supporting Information

### **Platanus hispanica-inspired Design of Co-Carbon Nanotube Frameworks through Chemical Vapor Deposition: Highly Integrated Hierarchical Electrocatalyst for Oxygen Reduction Reaction**

Min-Qiang Wang,<sup>a,†</sup> Cui Ye,<sup>b,†</sup> Shu-Juan Bao,<sup>a</sup> Zhao-Yang Chen,<sup>a</sup> Ya-Nan Yu,<sup>a</sup> Yan Zhang,<sup>a</sup> and Mao-Wen Xu<sup>a,\*</sup>

<sup>a</sup> Institute for Clean Energy & Advanced Materials, Faculty of Materials and Energy, Southwest University, Chongqing 400715, PR China

\* E-mail: xumaowen@swu.edu.cn

<sup>b</sup> Key Laboratory of Eco-environments in Three Gorges Reservoir Region (Ministry of Education), School of Chemistry and Chemical Engineering, Southwest University, Chongqing 400715, PR China

<sup>†</sup> These authors contribute equally to this work

## Experimental section

**Materials:** Cobalt nitrate hexahydrate ( $\text{Co}(\text{NO}_3)_2 \cdot 6\text{H}_2\text{O}$ ), glycerol and isopropanol were purchased from Aladdin Industrial Co., (Shanghai, China). Nafion solution (5 wt %), ethanol, and potassium hydroxide (KOH) were obtained from Sinopharm Chemical Reagent Co. The other chemicals were purchased from Sigma-Aldrich. Deionized water (18.2 MX) was used throughout the experiments. All chemicals used were of analytical grade and used as received without further purification.

**Synthesis of Co-glycerate precursor:** Cobalt nitrate ( $\text{Co}(\text{NO}_3)_2 \cdot 6\text{H}_2\text{O}$ , 0.22g) and glycerol (4.0 mL) were dissolved together in isopropanol (40 mL) under stirring for 2 h to form a transparent solution. And then the solution was transferred to a 100 mL Teflon-lined stainless steel autoclave and kept at 180 °C for 6 h. The resulting light pink product (Co-glycerate) was harvested by several rinse-precipitation cycles with ethanol. Finally, the pink powder of Co-glycerate was dried in vacuum at 60 °C.

**Synthesis of Co-CNTFs-750, Co-CNTFs and Co-CNTFs-550:** The above obtained Co-glycerate particles were dispersed in a ceramic boat, heated to different temperature of 750, 650 and 550 °C in a CVD furnace in Ar atmosphere, respectively. Then hydrogen gas (Ar : hydrogen=5:1) was inflated into the furnace for 10 min to reduce the metallic cobalt and form porous carbon spheres. Subsequently, 350 sccm  $\text{C}_2\text{H}_4$  was introduced for 5 min to in situ grow CNTs through porous Co-carbon spheres. Finally, the sample was rapidly cooled down to room temperature under the flow of argon. The product was noted as Co-CNTFs-750, Co-CNTFs and Co-CNTFs-550, respectively.

**Apparatus and Characterization:** Powder X-ray diffraction (XRD) patterns were obtained with a XRD-7000 (XRD, Shimadzu XRD-7000) with Cu  $\text{K}\alpha$  source radiation at a scanning rate of  $2^\circ \text{ min}^{-1}$  from 10 to  $80^\circ$ . The morphologies and microstructures were investigated by field-emission scanning electron microscopy (FESEM, JEOL-7800F), transmission electron microscope (TEM, JEM-2100), and

Energy-dispersive X-ray spectroscopy (EDX, INCA X-Max 250). The surface properties of the samples were studied by X-ray photoelectron spectroscopy (XPS, Escalab 250xi, Thermo Scientific). The Brunauer–Emmett–Teller (BET) surface area was measured by using Quadrasorb evo 2QDS-MP-30 (Quantachrome Instruments, USA). Thermogravimetric analysis was performed on Thermo Gravimetric Analyzer (TGA, Q50, USA) at a rate of 5 °C min<sup>-1</sup> under air from 30 to 700 °C.

**Electrochemical measurements:** The Co-CNTFs catalyst slurry was prepared by ultrasonically dispersing catalyst (2.0 mg) in a solution containing 1 mL of ethanol-DI water (1:1 vol) and 20 µL of 5 wt % Nafion solution. Then, 25 µL of the slurry was loaded onto a glassy carbon electrode. All electrochemical measurements were carried out on Autolab bi-potential station (CHI Instruments Inc.) by using the as-prepared electrode as working electrode, a platinum foil as counter electrode, and a Hg/HgO (1.0 M NaOH) as reference electrode. The electrolyte was 0.1 M KOH. For fuel crossover effect tests, the current response at -0.15 V Hg/HgO with an RDE rotation rate of 1600 rpm, with 5% (v/v) methanol being added into the O<sub>2</sub>-saturated electrolyte around 100 s. Accelerated durability test (ADT) was performed between 0.2 and -0.8 V at 50 mV s<sup>-1</sup> in 0.1 M KOH solution exposed to atmosphere.

The kinetic-limiting current density (JK) for the ORR was derived from the experimental data using the Koutecky-Levich equation (Eq. 1):

$$\frac{1}{|J|} = \frac{1}{|JL|} + \frac{1}{|JK|} = \frac{1}{B\sqrt{\omega}} + \frac{1}{|JK|}$$

$$B=0.2nFC_0(D_0)^{2/3}\nu^{-1/6}$$

where J and JL are the measured current and diffusion limiting current, respectively;  $\omega$  is the rotation speed in rpm, F is the Faraday constant (96,485 C mol<sup>-1</sup>), C<sub>0</sub> is the bulk concentration of oxygen (1.2 × 10<sup>-6</sup> mol cm<sup>-3</sup>), D<sub>0</sub> is the diffusion coefficient of oxygen in 0.1 M KOH (1.9 × 10<sup>-5</sup> cm<sup>2</sup> s<sup>-1</sup>), and  $\nu$  is the kinetic viscosity (0.01 cm<sup>2</sup> s<sup>-1</sup>). The n can be calculated from the slope of the K-L plot.

The electron transfer number (n) calculated from the RRDE measurement was based on the disk current ( $J_{\text{Disk}}$ ) and ring current ( $J_{\text{Ring}}$ ) via the following equation:

$$n = 4I_{\text{Disk}}/(I_{\text{Disk}}+I_{\text{Ring}}/N)$$

where  $N = 0.37$  is the current collection efficiency of Pt ring.

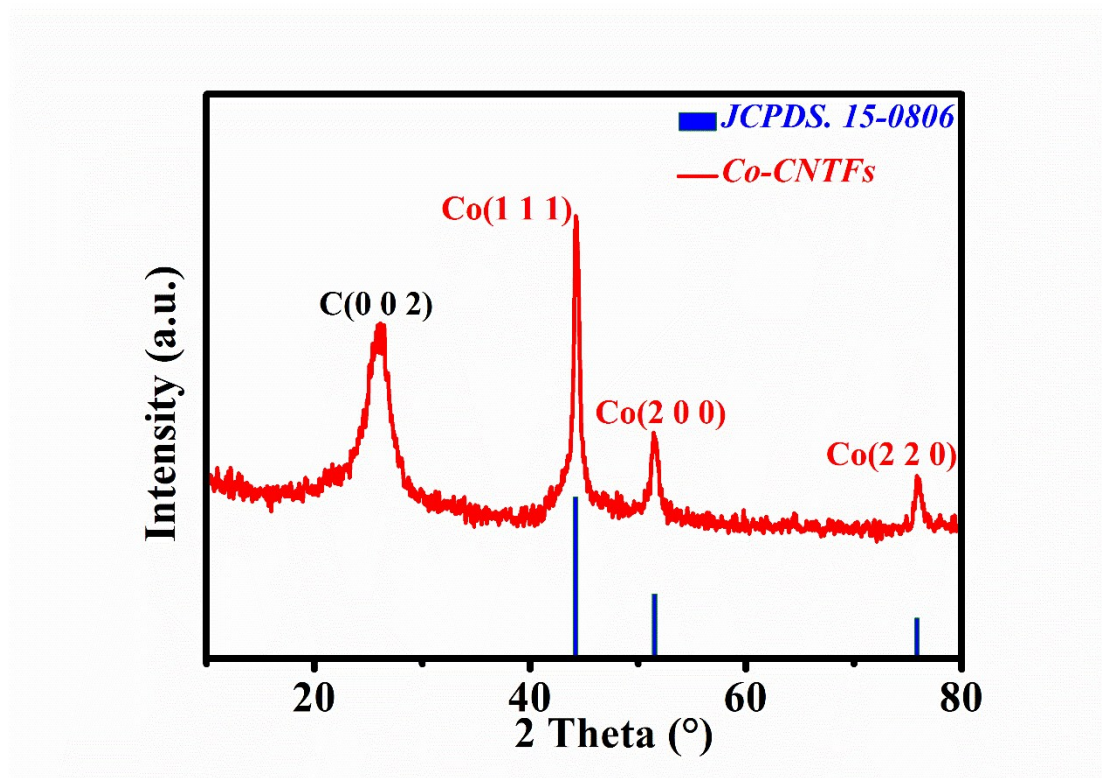

**Fig. S1.** XRD pattern of the as-prepared Co-CNTFs

Table. S1 The BET surface area, pore volume and average pores radius of all samples.

| Samples         | BET Surface Area (m <sup>2</sup> /g) | Pore Volume (cc/g) | Average Pores Radius (nm) |
|-----------------|--------------------------------------|--------------------|---------------------------|
| Commercial CNTs | 112.72                               | 0.256              | 1.7035                    |
| Co-PC           | 194.6                                | 0.372              | 1.7065                    |
| Co-CNTFs        | 316.7                                | 0.486              | 3.1476                    |

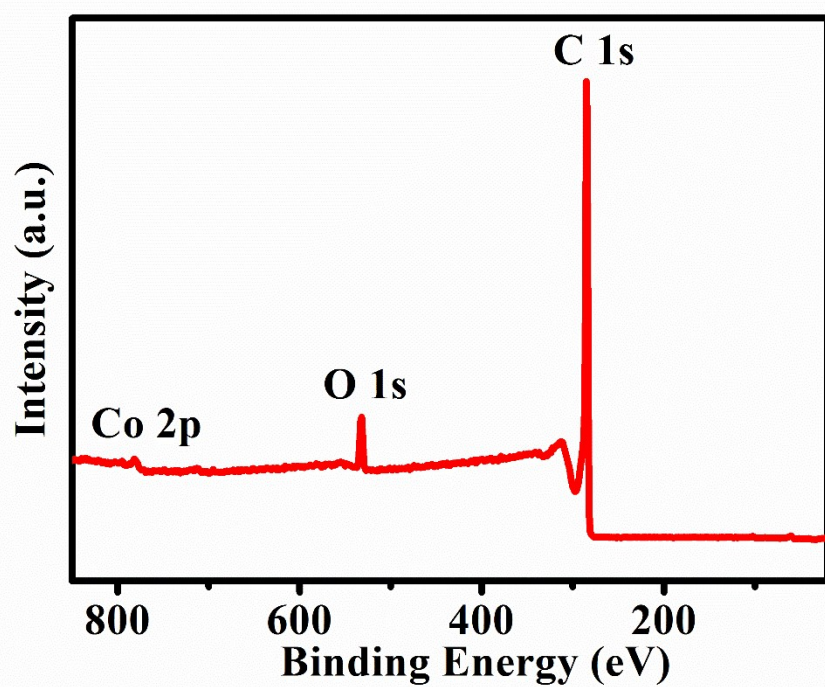

Fig. S2. XPS spectra of Co-CNTFs.

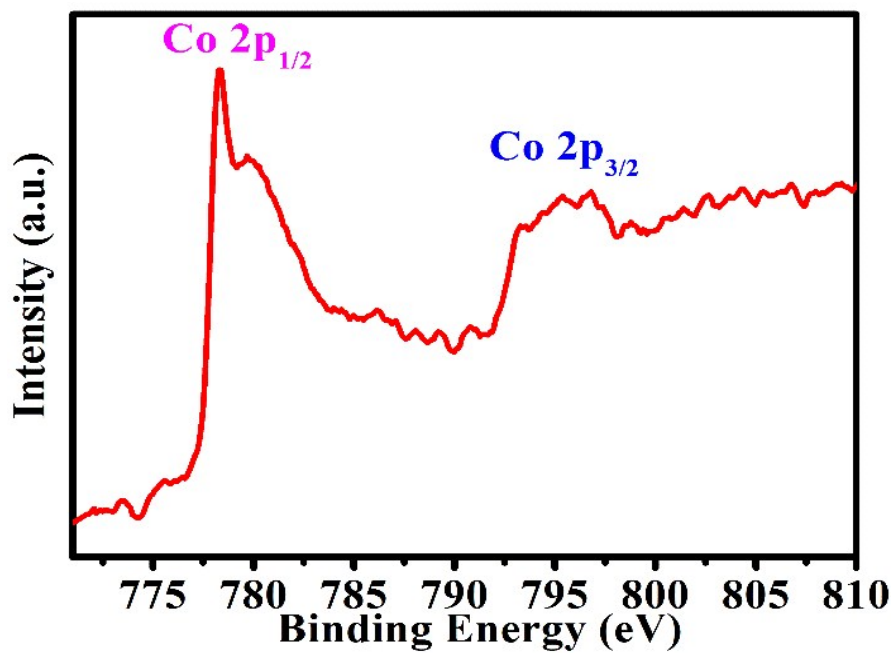

Fig. S3. High-resolution XPS spectra of Co 2p

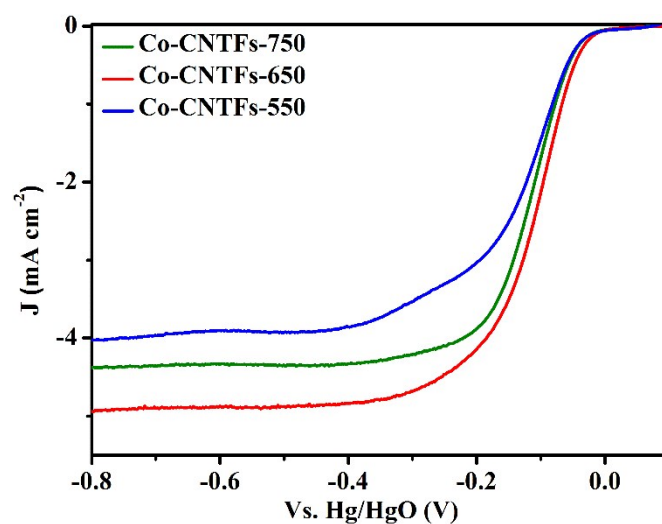

**Fig. S4** LSV curves of Co-CNTFs-750, Co-CNTFs and Co-CNTFs-550 at an RDE rotation speed of 1600 rpm with a scan rate of  $10 \text{ mV s}^{-1}$  in  $\text{O}_2$ -saturated  $0.1 \text{ M KOH}$  solution.

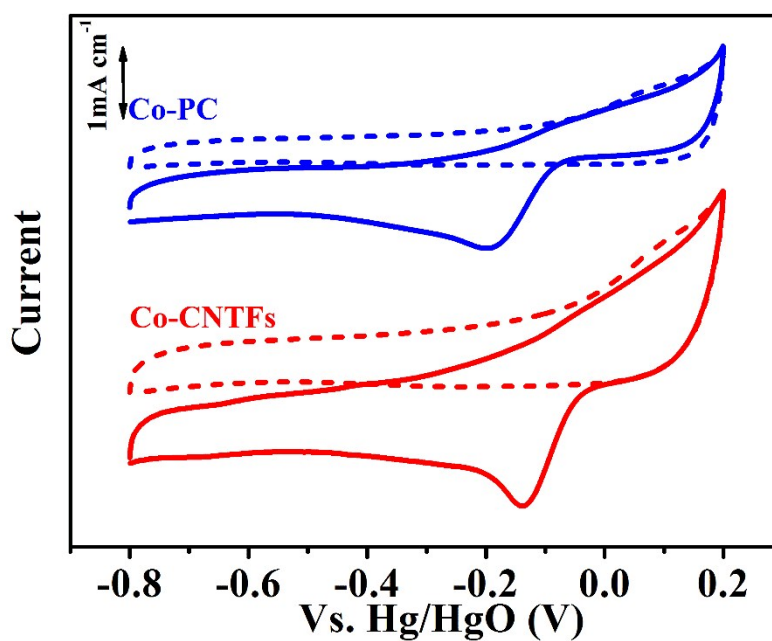

**Fig. S5.** Cyclic voltammetry (CV) curves of Co-PC and Co-CNTFs on glassy carbon electrodes in  $\text{O}_2$ -saturated (solid line) or  $\text{N}_2$ -saturated (dash line)  $0.1 \text{ M KOH}$ .



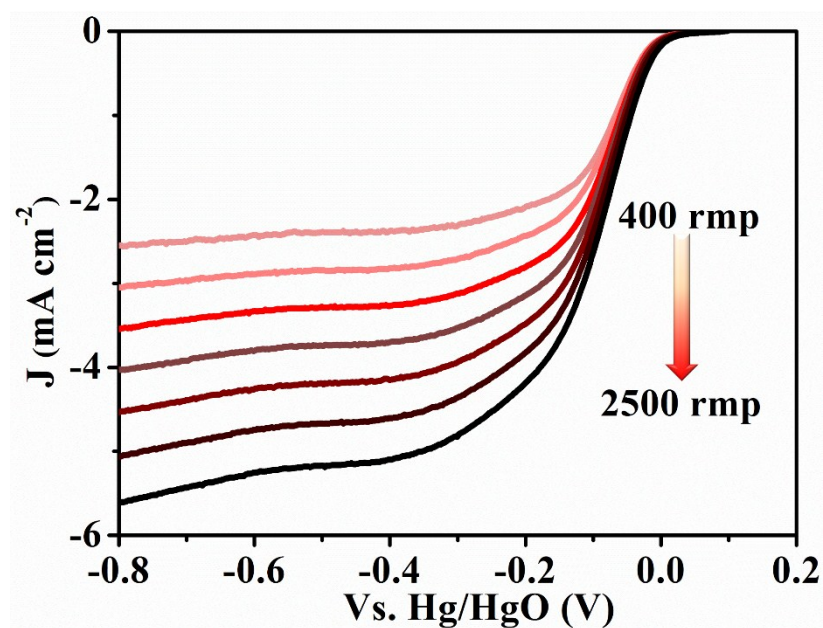

**Fig. S6.** LSV curves of Co-PC at different rotating speeds with a scan rate of 10 mV s<sup>-1</sup>.

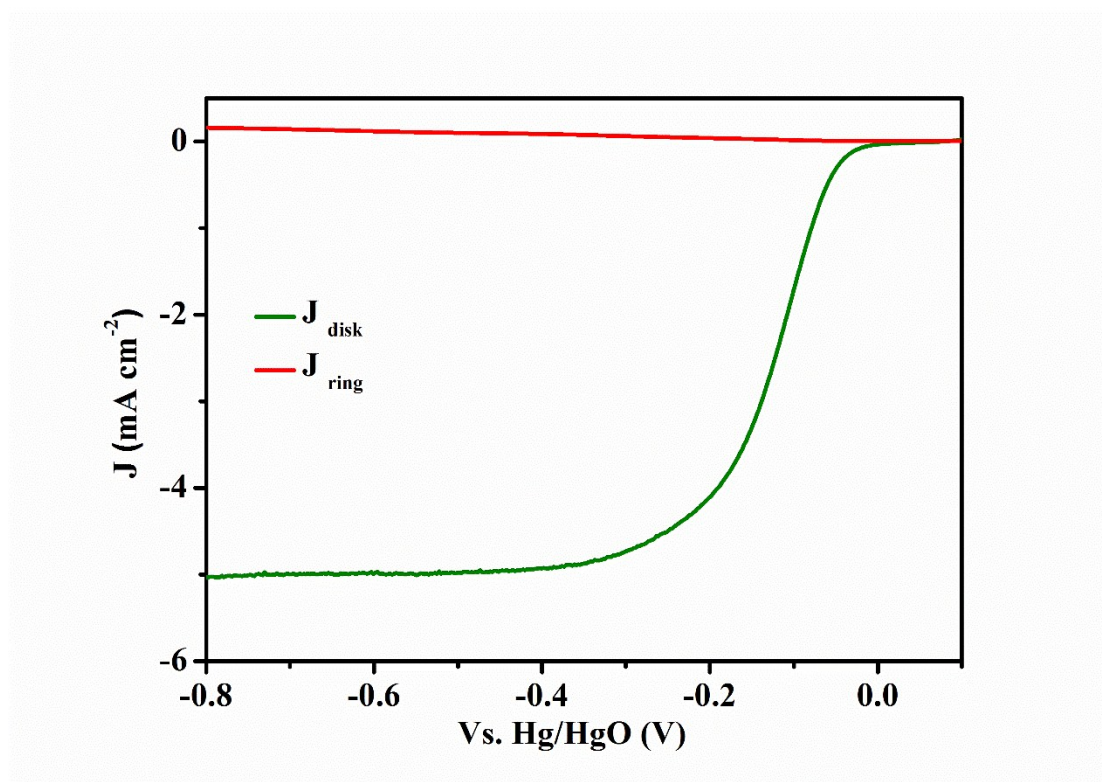

**Fig. S7** Rotating ring-disk electrode (RRDE) measurements of Co,N-CNF. The electron transfer number was calculated to be 3.8.



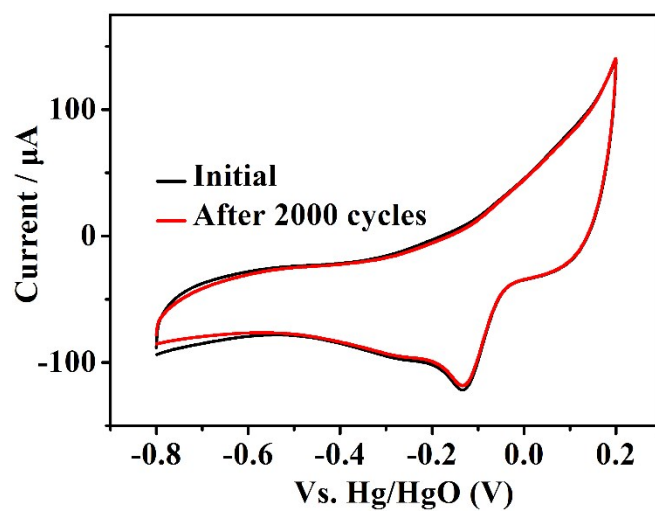

**Fig. S8** CV curves of Co-CNTFs in  $O_2$ -saturated 0.1 M KOH solution before and after ADT (2000 CV cycles between 0.2 and -0.8 V@50 mV s<sup>-1</sup> in KOH solution exposed to atmosphere).
